# Supplementary material for: A fast and easy strategy for protein purification using “teabags”
Source: PubMed Central journal article supplement (PMC4928122; doi:10.1038/srep28887), 2016-06-30
Supplement: srep28887-s1.pdf [file srep28887-s1.pdf]

Supplementary material accompanying “A fast and easy strategy for protein purification using ‘teabags’ ” by M. Castaldo, L. Barlind, F. Mauritzson, P. T. Wan, H.J. Snijder.

### Supplementary Figure S1

A step-by-step illustration of the construction of a protein purification teabag. From left-to-right and from top-to-bottom Step 1: Cut a 6 x12 cm piece of mesh with clean scissors. Step 2: Fold the mesh in the middle. Step 3 Heatseal along two of the open edges to yield a bag. Step 4: Load the bag with resin, taking care to apply the resin to the bottom of the bag. Step 5: Close the bag by heatsealing along the remaining open edge. The last image shows a filled teabag with His-tagged GFP immobilized on IMAC resin.

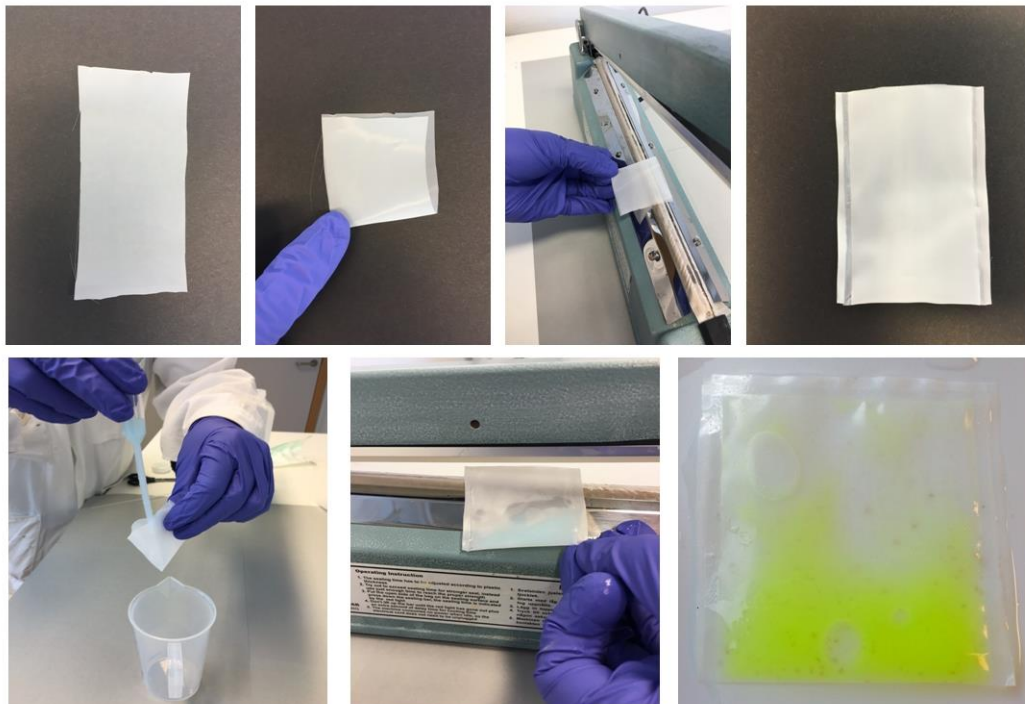

### Supplementary Figure S1

Supplementary Figure S2

SDS-PAGE analysis of his-tagged mPAI expressed in HEK cells, the 48 kDa mPAI is indicated by an arrow. The gel shows the comparison between the teabag purification and batch method. In all experiments 1 ml of Ni Excel™ (GE Healthcare) was used. The image shows that purification with the teabag method is comparable with conventional batch method. As shown there is almost no protein in the flow through and neglectable amounts of protein in the wash fractions. M = Marker (Novex Sharp), L = Load media, Ft = Flow through fractions, W = Wash fractions, E = Elution fractions

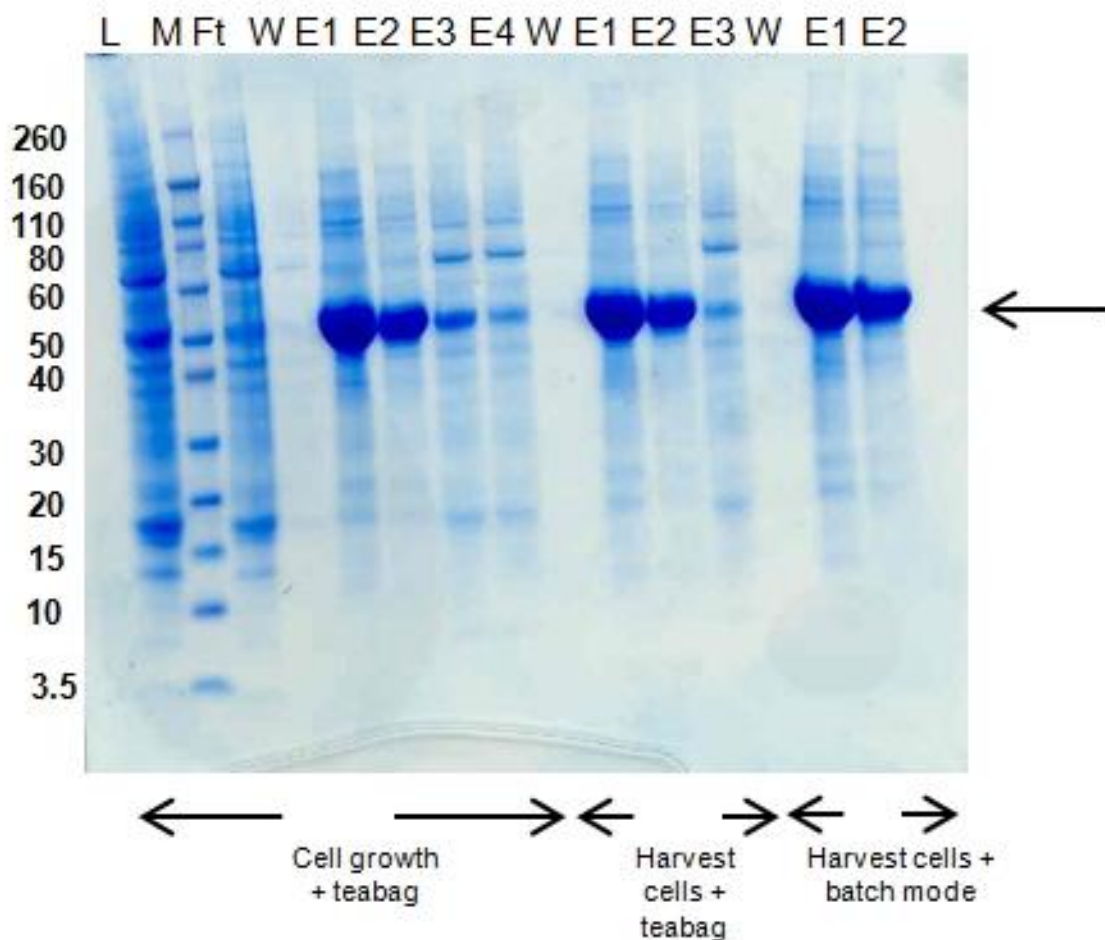

Supplementary Figure S2

### Supplementary Figure S3

Comparison of conventional packed column purification vs. teabag purifications of Fc-tagged VEGFR2 receptor using MabSelect SuRe™ affinity resin (GE Healthcare), the 110.8 kDa protein dimer is indicated by an arrow. The volume of resin in the two experiments was 1 ml. In these experiments the binding capacity of the resin was exceeded, as is apparent from the excess material in the non-bound fraction. A duplicate teabag purification showed nearly identical results (results not shown). M = Marker, L = Load media, Ft = Flow through fractions, W = Wash fractions, E = Elution fractions. For the teabag purification two dilutions have been loaded on gel, the latter corresponds to an equal amount as for the column purification.

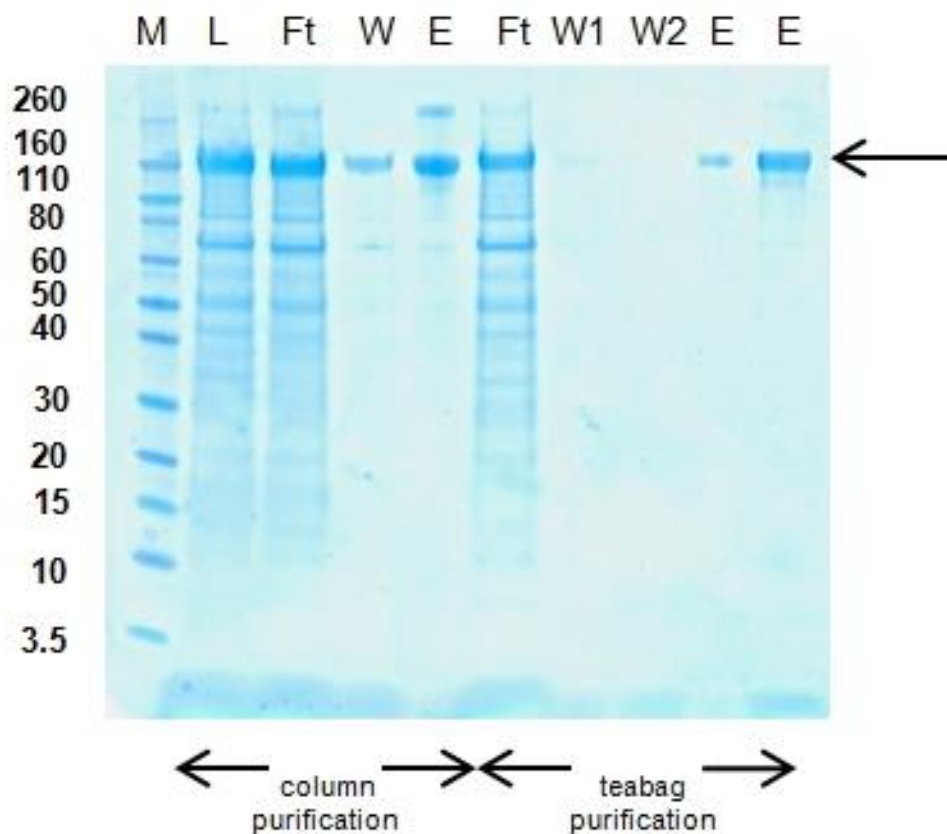

### Supplementary Figure S3

Supplementary Figure S4

SDS-PAGE analysis of a full length His-tagged intracellular protein expressed in *Sf21* insect cells, the 142 kDa protein is indicated by an arrow. Figure S4 shows the purification using the teabag method. Ni Sepharose (GE Healthcare) was used. M = Marker, L = Clarified lysate, Ft = Flow through fractions, W = Wash fractions, E = Elution fractions.

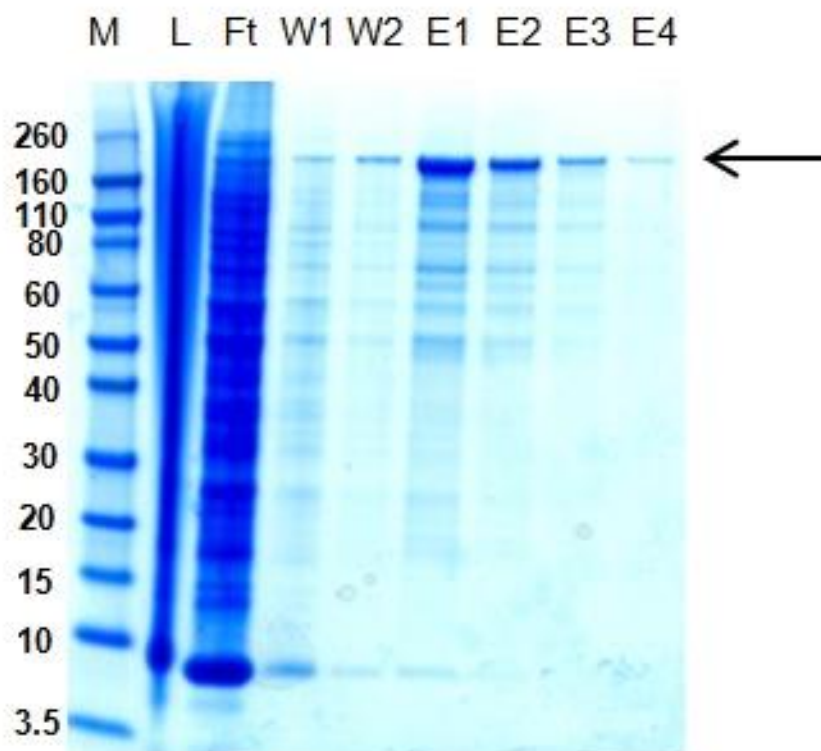

Supplementary Figure S4

Supplementary Figure S5

SDS-PAGE analysis of His-tagged Keap-1 expressed in *E. coli*, the 34 kDa protein is indicated by an arrow. Supplementary Figure S5 shows the comparison between the teabag method (left) and the batch method (right). In the comparison 1 ml of Ni Sepharose FF (GE Healthcare) was used. The images show that purification with the teabag method is equal to or better than the conventional batch method. As shown there is almost no protein in the flow through and negligible amounts of protein in the wash fractions. M = Marker, L = Clarified lysate, Ft = Flow through fractions, W = Wash fractions, E = Elution fractions.

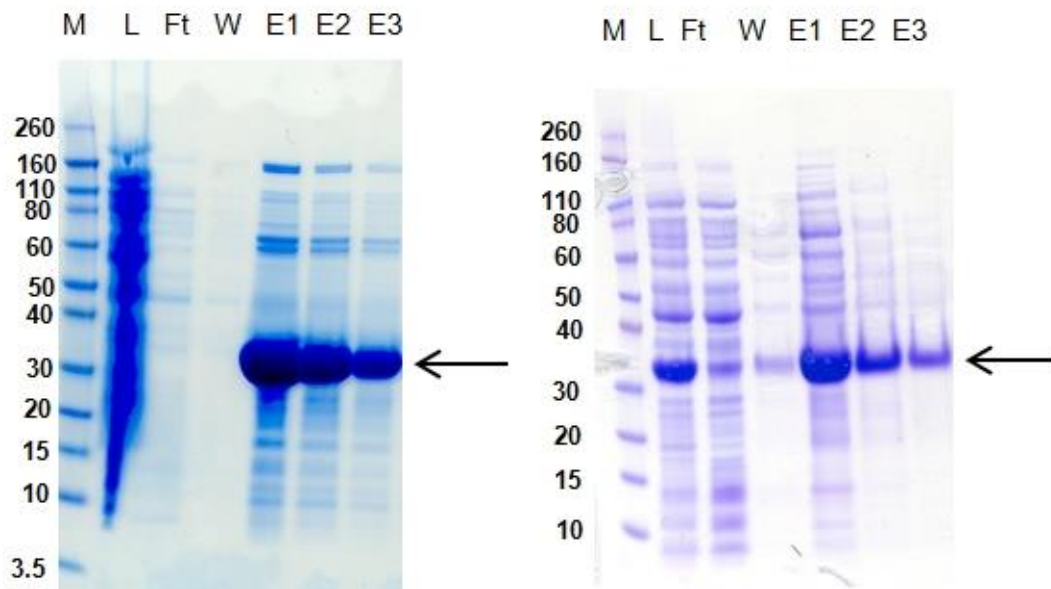

Supplementary Figure S5

### Supplementary Figure S6

SDS-PAGE analysis of a 13.0 kDa human EF-hand protein domain (indicated by an arrow) expressed intracellularly in *E. coli*. Supplementary Figure S6 shows a gel comparing IMAC affinity capture of the protein from cleared lysate or total non-clarified lysate using the teabag method. Ni Sepharose FF (GE Healthcare) was used as affinity resin. Each sample was loaded in duplicates. M = Marker, L = Lysate, Ft = Flow through fractions, W = Wash fractions, E = Elution fractions, tot = total lysate, clr = cleared lysate.

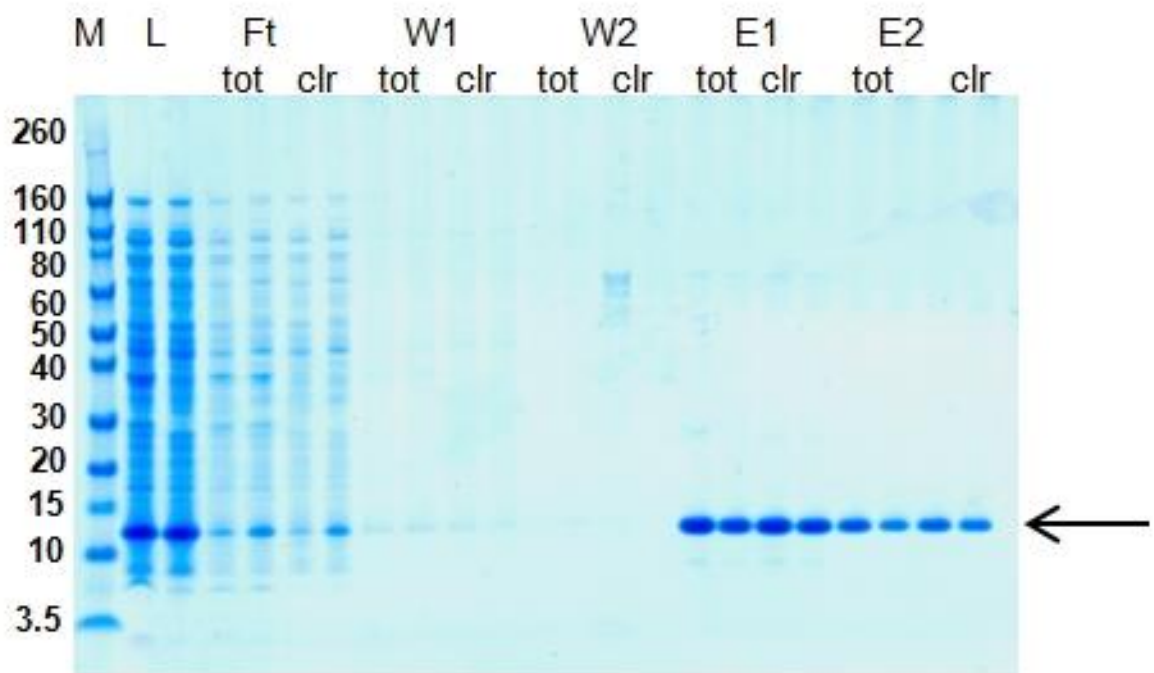

Supplementary Figure S6

## Supplementary Figure S7

Supplementary Figure S7A shows representative size exclusion chromatographic traces of a 13.0 kDa EF-hand protein domain purified using IMAC teabags from total *E. coli* lysate or after lysate clarification, and after freezing the teabag with the affinity captured protein once or twice. The teabags were kept frozen for one week prior to thawing, elution and subsequent size exclusion chromatographic separation. Supplementary Figure S7B shows the integrated peak intensities from duplicate experiments. The figures illustrate that this protein immobilized on resin inside teabags can be frozen without significant effect on the protein quality as judged by SEC.

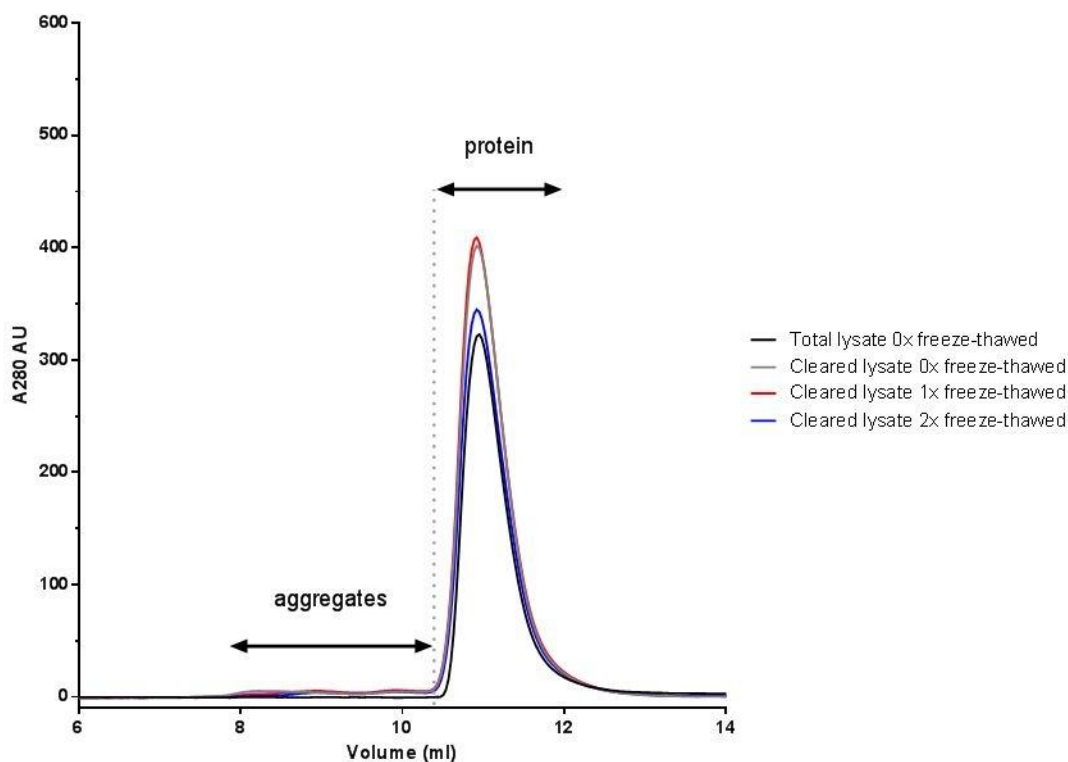

Supplementary Figure S7 A

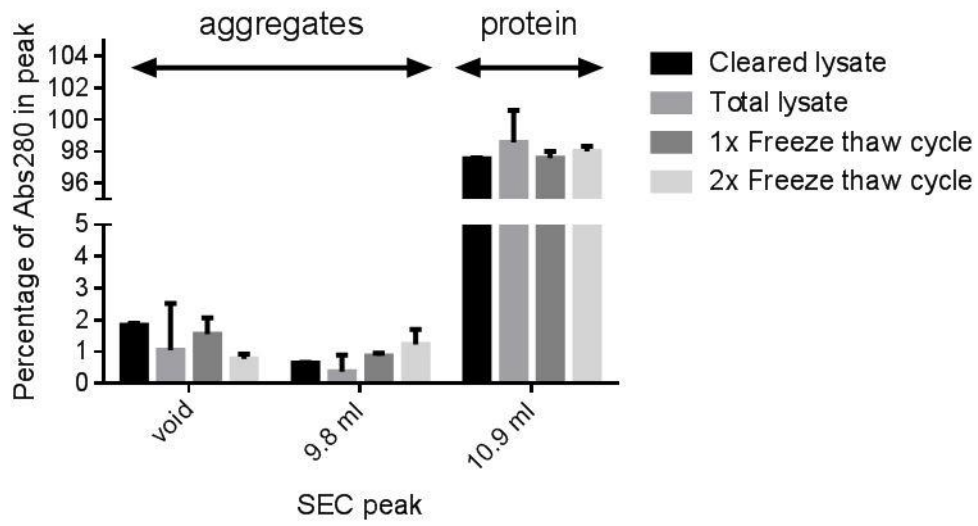

Supplementary Figure S7 B



Supplementary Table 1 accompanying “A fast and easy strategy for protein purification using ‘teabags’ ” by M. Castaldo, L. Barlind, F. Mauritzson, P. T. Wan, H.J. Snijder.

Summary of different protein targets and expression systems where conventional purification methods have been compared with the teabag method. In some cases the teabag method has been used exclusively.

| Target | expression system | culture volume (ml) | resin              | resin volume (ml) | method                              | wash buffer | elution buffer          | elution (ml) | purity (%) | yield (mg) | yield (mg/L) |
|--------|-------------------|---------------------|--------------------|-------------------|-------------------------------------|-------------|-------------------------|--------------|------------|------------|--------------|
| mPAI   | CHO-EBNA GS       | 100                 | Ni Sepharose Excel | 1                 | batch                               | 1xPBS       | 1xPBS, 500 mM Imidazole | 7x1 ml       | 50         | 2          | 20           |
| mPAI   | CHO-EBNA GS       | 100                 | Ni Sepharose Excel | 1                 | batch<br>cleared<br>growth<br>media | 1xPBS       | 1xPBS, 500 mM Imidazole | 7x1 ml       | 50         | 2          | 20           |
| mPAI   | CHO-EBNA GS       | 100                 | Ni Sepharose Excel | 1                 | teabag                              | 1xPBS       | 1xPBS, 500 mM Imidazole | 7x1 ml       | 50         | 2          | 20           |
| mPAI   | HEK293 6E         | 100                 | Ni Sepharose Excel | 1                 | batch                               | 1xPBS       | 1xPBS, 500 mM Imidazole | 7x1 ml       | 50         | 1.7        | 17           |
| mPAI   | HEK293 6E         | 100                 | Ni Sepharose Excel | 1                 | batch<br>cleared<br>growth<br>media | 1xPBS       | 1xPBS, 500 mM Imidazole | 7x1 ml       | 50         | 1.7        | 17           |
| mPAI   | HEK293 6E         | 100                 | Ni Sepharose Excel | 1                 | teabag                              | 1xPBS       | 1xPBS, 500 mM Imidazole | 7x1 ml       | 50         | 1.7        | 17           |
| TGFb-1 | CHO-EBNA GS       | 3000                | Ni Sepharose Excel | 5                 | teabag                              | 1xPBS       | 1xPBS, 500 mM Imidazole | 7x5 ml       | >95        | 3          | 1            |

|                               |               |     |                       |   |        |                                                                                                                                          |                                                                                                                                                                  |         |      |     |      |
|-------------------------------|---------------|-----|-----------------------|---|--------|------------------------------------------------------------------------------------------------------------------------------------------|------------------------------------------------------------------------------------------------------------------------------------------------------------------|---------|------|-----|------|
| <b>VEGFR2-Fc</b>              | CHO-EBNA GS   | 70  | MabSelect SuRe        | 1 | column | 1xPBS                                                                                                                                    | 50 mM Glycine pH 3.0,<br>0.1 M NaCl                                                                                                                              | 4 ml    | > 95 | 4   | 57   |
| <b>VEGFR2-Fc</b>              | CHO-EBNA GS   | 5   | MabSelect SuRe        | 1 | teabag | 1xPBS                                                                                                                                    | 50 mM Glycine pH 3.0,<br>0.1 M NaCl                                                                                                                              | 1 ml    | > 95 | 0.3 | 60   |
| <b>scFv</b>                   | CHO-EBNA GS   | 250 | Ni Sepharose FF       | 2 | batch  | 25 mM Tris/HCl, pH 7.5, 300<br>mM NaCl, 20 mM Imidazole, 1<br>mM TCEP                                                                    | 25 mM Tris/HCl, pH 7.5,<br>300 mM NaCl, 500 mM<br>Imidazole, 1 mM TCEP                                                                                           | 5x2 ml  | <60  | 2.1 | 8.4  |
| <b>scFv</b>                   | CHO-EBNA GS   | 250 | Ni Sepharose<br>Excel | 1 | batch  | 25 mM Tris/HCl, pH 7.5, 300<br>mM NaCl, 20 mM Imidazole, 1<br>mM TCEP                                                                    | 25 mM Tris/HCl, pH 7.5,<br>300 mM NaCl, 500 mM<br>Imidazole, 1 mM TCEP                                                                                           | 5x1 ml  | 30   | 2   | 8    |
| <b>scFv</b>                   | CHO-EBNA GS   | 250 | Ni Sepharose FF       | 1 | teabag | 25 mM Tris/HCl, pH 7.5, 300<br>mM NaCl, 20 mM Imidazole, 1<br>mM TCEP                                                                    | 25 mM Tris/HCl, pH 7.5,<br>300 mM NaCl, 500 mM<br>Imidazole, 1 mM TCEP                                                                                           | 7x1 ml  | >60  | 4.4 | 17.6 |
| <b>intracellular<br/>prot</b> | <i>Sf21</i>   | 500 | Ni Sepharose FF       | 1 | batch  | 50 mM Tris/HCl, pH 8, 500 mM<br>NaCl, 200 mM Arginine, 1 mM<br>TCEP, 0.2 mM Na<br>orthovanadate, 0.25 mM Na<br>pyrophosphate, 0.5 mM NaF | 50 mM Tris/HCl, pH 8,<br>500 mM NaCl, 200 mM<br>Arginine, 1 mM TCEP, 500<br>mM Imidazole, 0.2 mM<br>Na orthovanadate, 0.25<br>mM Na pyrophosphate,<br>0.5 mM NaF | 7x1 ml  | 55   | 4   | 8    |
| <b>intracellular<br/>prot</b> | <i>Sf21</i>   | 500 | Ni Sepharose FF       | 1 | teabag | 50 mM Tris/HCl, pH 8, 500 mM<br>NaCl, 200 mM Arginine, 1 mM<br>TCEP, 0.2 mM Na<br>orthovanadate, 0.25 mM Na<br>pyrophosphate, 0.5 mM NaF | 50 mM Tris/HCl, pH 8,<br>500 mM NaCl, 200 mM<br>Arginine, 1 mM TCEP, 500<br>mM Imidazole, 0.2 mM<br>Na orthovanadate, 0.25<br>mM Na pyrophosphate,<br>0.5 mM NaF | 7x1 ml  | 55   | 4.5 | 9    |
| <b>Keap-1</b>                 | <i>E.coli</i> | 300 | Ni Sepharose FF       | 1 | batch  | 50 mM Tris/HCl, pH 8, 500 mM<br>NaCl, 20 mM Imidazole, 10 %<br>glycerol, 1 mM TCEP                                                       | 50 mM Tris/HCl, pH 8,<br>500 mM NaCl, 300 mM<br>Imidazole, 10 % glycerol,<br>1 mM TCEP                                                                           | 10x1 ml | >60  | 8.4 | 28   |

|                                       |                |     |                   |   |                           |                                                                              |                                                                               |         |     |     |      |
|---------------------------------------|----------------|-----|-------------------|---|---------------------------|------------------------------------------------------------------------------|-------------------------------------------------------------------------------|---------|-----|-----|------|
| <b>Keap-1</b>                         | <i>E. coli</i> | 300 | Ni Sepharose FF   | 1 | teabag                    | 50 mM Tris/HCl, pH 8, 500 mM NaCl, 20 mM Imidazole, 10 % glycerol, 1 mM TCEP | 50 mM Tris/HCl, pH 8, 500 mM NaCl, 300 mM Imidazole, 10 % glycerol, 1 mM TCEP | 10x1 ml | >60 | 9   | 30   |
| <b>Rat flavin containing enzyme 1</b> | <i>E. coli</i> | 375 | Ni-NTA Super Flow | 1 | batch                     | 50 mM HEPES pH 7.3, 100 mM NaCl, 10% glycerol and 1 mM TCEP                  | 50 mM HEPES pH 7.3, 100 mM NaCl, 10% glycerol 300 mM Imidazole and 1 mM TCEP  | 5 ml    | 75% | 4.5 | 12   |
| <b>Rat flavin containing enzyme 1</b> | <i>E. coli</i> | 375 | Ni-NTA Super Flow | 1 | teabag                    | 50 mM HEPES pH 7.3, 100 mM NaCl, 10% glycerol and 1 mM TCEP                  | 50 mM HEPES pH 7.3, 100 mM NaCl, 10% glycerol 300 mM Imidazole and 1 mM TCEP  | 5 ml    | 75% | 6.5 | 17.3 |
| <b>Rat flavin containing enzyme 2</b> | <i>E. coli</i> | 375 | Ni-NTA Super Flow | 1 | teabag                    | 50 mM HEPES pH 7.3, 100 mM NaCl, 10% glycerol and 1 mM TCEP                  | 50 mM HEPES pH 7.3, 100 mM NaCl, 10% glycerol 300 mM Imidazole and 1 mM TCEP  | 5 ml    | 75% | 5   | 13.3 |
| <b>Human EF-hand domain protein</b>   | <i>E. coli</i> | 175 | Ni-NTA Super Flow | 1 | teabag cleared lysate     | 40 mM HEPES pH 7.4, 300 mM NaCl                                              | 40 mM HEPES pH 7.4, 300 mM NaCl, 300 mM Imidazole                             | 5 ml    | 95% | 6.5 | 37.1 |
| <b>Human EF-hand domain protein</b>   | <i>E. coli</i> | 175 | Ni-NTA Super Flow | 1 | teabag non-cleared lysate | 40 mM HEPES pH 7.4, 300 mM NaCl                                              | 40 mM HEPES pH 7.4, 300 mM NaCl, 300 mM Imidazole                             | 5 ml    | 95% | 6.3 | 36   |
